# Supplementary material for: Heronry distribution and site preference dynamics of tree-nesting colonial waterbirds in Tamil Nadu
Source: PeerJ. 2021 Oct 7;9:e12256. doi: 10.7717/peerj.12256 (PMC8502450; doi:10.7717/peerj.12256)
Supplement: Supplemental Information 8 [file peerj-09-12256-s008.xlsx]

## Sheet: 17-18
Heronry	Year	Asianopenbill	spoonbill	Little cormorant	Indian cormorant	Great cormorant	Little Egret	Intermediate Egret	Large Egret	Cattle egret	Purple Heron	Night Heron	Pond Heron	Grey heron	RednapedIbis	Glossy Ibis	Painted Stork	Pelican	blackheadedibis	Darter	Total
1	2017-18	4320	248	4410	3260	0	1410	789	123	1543	0	568	442	179	0	3240	4056	3673	2203	147	30611
2	2017-18	176	47	2842	465	0	194	73	0	172	0	224	60	83	0	0	15	8	239	124	4722
3	2017-18	0	0	134	0	0	21	18	0	0	0	72	22	15	0	0	0	0	0	0	282
4	2017-18	191	0	524	76	0	143	25	22	0	6	371	147	92	0	1007	0	0	563	49	3216
5	2017-18	76	0	3512	1752	0	187	132	21	132	51	1675	123	97	0	65	0	0	543	63	8429
6	2017-18	0	0	0	0	0	0	0	0	0	0	0	0	0	0	0	0	0	0	0	0
7	2017-18	0	0	95	0	0	49	0	0	0	0	0	0	0	0	0	78	0	0	23	239
8	2017-18	0	0	0	0	0	0	0	0	0	0	0	0	0	0	0	0	0	0	0	0
9	2017-18	0	0	79	0	0	29	15	11	0	0	0	0	0	0	0	0	0	0	0	134
10	2017-18	0	0	0	0	0	57	0	0	0	0	0	0	21	0	0	0	0	0	0	78
11	2017-18	0	0	0	0	0	24	0	0	0	0	0	0	23	0	0	0	0	0	0	47
12	2017-18	39	48	760	287	0	66	57	45	322	0	285	159	67	112	1037	2156	1893	224	54	7611
13	2017-18	0	29	0	0	0	0	0	0	0	0	0	0	0	0	0	141	197	0	0	367
14	2017-18	0	0	72	0	0	28	0	0	0	0	0	229	0	0	0	421	178	0	0	928
15	2017-18	0	15	143	0	0	0	0	0	0	0	0	0	19	0	0	0	75	231	31	514
16	2017-18	0	33	187	134	0	39	32	0	0	0	97	0	46	0	0	0	0	41	26	635
17	2017-18	424	0	281	0	0	177	0	0	0	0	297	333	0	0	0	0	0	169	44	1725
18	2017-18	122	78	1236	384	65	218	77	0	0	46	361	288	132	0	0	0	93	367	91	3558
19	2017-18	0	0	0	0	0	0	0	0	0	0	97	69	0		0	102	79	0	0	347
20	2017-18	0	61	152	47	0	29	48	0	0	0	77	81	53	0	0	286	161	135	44	1174
21	2017-18	0	0	20	0	0	0	0	0	1765	0	44	0	31	0	56	315	234	34	18	2517
22	2017-18	0	0	173	0	0	112	0	0	0	0	286	0	0	0	0	0	0	0	0	571
23	2017-18	0	0	45	0	0	0	0	0	0	0	0	0	0	0	0	0	0	0	34	79
24	2017-18	11	0	25	0	0	34	15	0	56	7	42	19	0	0	56	0	0	28	0	293
25	2017-18	0	0	52	0	0	71	49	0	0	0	179	0	0	0	0	0	0	0	0	351
26	2017-18	0	227	270	36	0	97	210	0	0	0	127	0	56	0	0	380	543	82	36	2064
27	2017-18	0	0	0	0	0	0	0	0	0	0	0	134	0	0	0	0	0	0	0	134
28	2017-18	0	0	91	0	0	28	45	0	0	0	35	63	0	0	0	0	0	0	0	262
29	2017-18	0	0	0	0	0	0	0	0	0	0	0	98	0	0	0	0	0	0	0	98
30	2017-18	0	0	0	0	0	0	0	0	0	0	0	65	0	0	0	0	0	0	0	65
31	2017-18	0	0	86	0	0	49	0	0	0	0	0	0	0	0	0	0	0	0	23	158
32	2017-18	0	0	0	0	0	0	0	0	0	0	0	0	0	0	0	0	0	0	0	0
33	2017-18	0	0	0	0	0	0	0	0	0	0	0	0	0	0	0	0	24	0	0	24
34	2017-18	0	0	0	0	0	0	0	0	0	0	0	0	0	0	0	0	59	0	0	59
35	2017-18	0	0	62	0	0	19	24	0	89	17	54	31	0	0	0	0	0	0	0	296
36	2017-18	261	0	1985	365	0	134	83	0	2030	11	304	298	89	0	6523	0	0	164	51	12298
37	2017-18	34	0	204	0	0	77	36	0	0	8	126	53	0	0	132	0	0	0	26	696
38	2017-18	0	0	76	0	0	0	0	0	0	0	0	0	0	24	0	0	0	0	12	112
39	2017-18	0	0	0	0	0	0	0	0	0	0	0	0	0	29	0	0	0	0	0	29
40	2017-18	0	0	0	0	0	0	0	0	0	0	0	0	0	0	0	0	0	0	0	0
41	2017-18	58	43	76	78	0	48	0	0	101	0	0	32	29	0	0	0	0	132	37	634
42	2017-18	76	21	101	0	0	44	42	0	0	0	67	0	19	0	0	0	0	86	15	471
43	2017-18	0	0	138	0	0	65	0	0	0	0	0	0	0	0	0	0	0	0	0	203
44	2017-18	0	0	121	37	0	0	0	0	0	0	0	0	0	0	0	0	0	0	0	158
45	2017-18	0	0	84	67	0	0	0	0	0	17	54	29	43	0	0	0	0	0	11	305
46	2017-18	0	0	0	0	0	0	0	0	0	0	0	0	0	0	0	0	0	0	0	0
47	2017-18	0	0	55	0	0	0	0	0	0	0	58	21	37	0	0	0	0	0	0	171
48	2017-18	0	0	136	0	0	35	25	0	0	6	13	0	0	0	0	0	0	0	19	234
49	2017-18	0	0	106	27	0	15	0	0	0	0	0	0	0	0	0	0	0	0	0	148
50	2017-18	47	0	162	36	0	32	21	0	0	11	56	19	41	0	0	0	19	0	23	467
51	2017-18	0	0	98	43	0	0	0	0	0	0	41	0	0	0	0	0	0	0	0	182
52	2017-18	0	0	67	0	0	17	11	0	0	0	0	49	0	0	0	0	0	0	16	160
53	2017-18	0	0	46	0	0	39	0	0	0	0	0	0	59	0	0	0	0	0	0	144
54	2017-18	0	0	187	0	0	143	0	0	0	0	201	0	0	0	0	0	0	0	0	531
55	2017-18	0	0	287	0	0	65	0	0	0	0	0	9	0	0	0	0	0	0	0	361
56	2017-18	0	0	305	0	0	101	31	0	0	0	134	0	0	0	0	0	0	0	0	571
57	2017-18	0	0	87	0	0	29	0	0	0	0	0	0	0	0	0	0	0	0	0	116
58	2017-18	0	0	0	0	0	0	0	0	0	0	15	0	0	0	0	0	0	0	0	15
59	2017-18	0	0	73	0	0	0	0	0	0	0	0	0	0	0	0	0	0	0	0	73
60	2017-18	0	0	143	0	0	0	0	0	0	0	25	34	0	0	0	0	0	0	0	202
61	2017-18	0	0	35	0	0	0	0	0	0	0	0	0	0	0	0	0	0	0	0	35
62	2017-18	0	0	72	0	0	42	43	0	0	0	21	0	0	0	0	0	0	0	0	178
63	2017-18	0	0	137	0	0	49	0	0	0	0	87	0	0	0	0	0	0	0	0	273
64	2017-18	0	0	0	0	0	0	0	0	0	0	0	0	0	0	0	0	0	0	0	0
65	2017-18	0	0	165	89	0	0	69	0	0	0	46	0	0	0	0	0	0	0	0	369
66	2017-18	0	0	0	285	0	0	0	0	0	0	59	0	0	0	0	0	0	0	0	344
67	2017-18	0	0	28	0	0	25	0	0	0	0	66	51	0	0	0	0	0	0	0	170
68	2017-18	0	0	0	0	0	0	0	0	0	0	0	0	0	0	0	0	0	0	0	0
69	2017-18	0	0	0	0	268	0	0	0	0	0	0	0	0	0	0	0	0	0	0	268
70	2017-18	0	0	0	0	0	0	0	0	0	9	0	21	27	0	0	0	0	0	0	57
71	2017-18	0	0	42	81	0	9	0	0	0	0	0	34	0	0	0	0	0	0	0	166
72	2017-18	0	0	223	98	0	78	0	0	0	0	0	0	0	0	0	0	0	0	0	399
73	2017-18	0	0	0	0	0	54	0	0	0	0	44	35	0	0	0	0	0	0	0	133
74	2017-18	0	0	51	0	0	49	0	0	0	0	0	63	0	0	0	0	0	0	0	163
75	2017-18	0	0	0	0	0	0	0	0	0	0	0	0	0	0	0	0	0	0	0	0
76	2017-18	0	0	78	0	0	44	29	0	0	0	27	36	0	0	0	0	0	0	0	214
77	2017-18	0	0	0	0	0	0	0	0	0	0	0	0	0	0	0	0	0	0	0	0
78	2017-18	0	0	43	0	0	18	0	0	0	0	77	0	45	0	0	0	0	0	0	183
79	2017-18	0	0	78	0	0	36	0	0	0	0	54	0	0	0	0	0	0	0	0	168
80	2017-18	0	0	34	0	0	52	0	56	0	0	87	43	0	0	181	0	0	0	0	453
81	2017-18	0	0	0	0	0	0	0	0	0	0	0	27	0	0	0	19	0	22	0	68
82	2017-18	0	0	0	0	67	0	0	0	0	0	0	0	0	0	0	0	0	0	0	67
83	2017-18	192	52	456	532	0	65	0	0	0	0	321	67	88	0	72	0	0	179	73	2097
84	2017-18	43	0	27	0	0	0	0	39	0	0	79	0	58	0	0	134	0	0	0	380
85	2017-18	0	0	86	0	0	29	0	0	0	0	0	0	0	0	0	0	0	0	0	115
86	2017-18	0	0	189	0	0	27	0	0	0	0	0	0	0	0	0	0	0	0	0	216
87	2017-18	0	0	73	34	0	19	0	0	0	0	0	0	0	0	0	0	0	0	0	126
88	2017-18	0	0	381	301	0	49	26	0	0	0	187	0	0	0	0	0	0	0	68	1012
89	2017-18	0	0	52	0	0	50	0	0	0	0	78	0	0	0	0	0	0	0	0	180
90	2017-18	0	0	78	0	0	65	0	0	0	0	0	0	0	0	0	0	0	0	0	143
91	2017-18	0	0	65	0	0	0	0	0	198	0	0	0	0	0	0	0	0	0	8	271
92	2017-18	24	0	107	0	0	56	37	0	0	0	33	0	0	0	345	0	0	0	0	602
93	2017-18	0	0	69	0	0	45	0	0	0	0	0	0	0	0	0	0	0	0	0	114
94	2017-18	0	0	81	0	0	18	0	0	0	0	0	0	0	0	0	0	0	0	0	99
95	2017-18	0	0	0	0	0	85	0	0	0	0	0	101	0	0	0	0	0	0	0	186
96	2017-18	0	0	72	0	0	89	0	0	0	0	0	0	0	0	0	0	0	0	0	161
97	2017-18	0	0	242	0	0	34	0	0	0	0	0	86	0	0	0	0	0	0	0	362
98	2017-18	0	0	51	0	0	15	0	0	0	0	0	0	0	0	0	0	0	0	0	66
99	2017-18	0	0	1065	0	0	187	0	0	0	0	432	0	0	0	0	0	0	0	0	1684
100	2017-18	0	0	342	0	0	54	39	0	0	0	0	54	0	0	0	0	0	0	0	489
101	2017-18	0	0	76	0	0	0	0	0	0	0	0	0	0	0	0	0	0	0	0	76

## Sheet: 18-19
Heronry	Year	Asianopenbill	spoonbill	Little cormorant	Indian cormorant	Great cormorant	Little Egret	Intermediate Egret	Large Egret	Cattle egret	Purple Heron	Night Heron	Pond Heron	Grey heron	RednapedIbis	Glossy Ibis	Painted Stork	Pelican	blackheadedibis	Darter	Total
1	2018-19	0	85	323	105	0	47	19	0	0	0	41	28	68	0	0	445	393	91	33	1678
2	2018-19	0	0	121	35	0	0	0	0	976	0	56	41	45	0	65	320	234	43	11	1947
3	2018-19	0	0	124	0	0	78	0	0	0	0	101	0	0	0	0	0	0	0	0	303
4	2018-19	0	0	0	0	0	0	0	0	0	0	0	0	0	0	0	0	0	0	16	16
5	2018-19	0	0	0	0	0	0	0	0	0	0	0	0	0	0	0	0	0	0	0	0
6	2018-19	0	0	95	0	0	34	28	0	0	0	89	0	0	0	0	0	0	0	0	246
7	2018-19	0	98	82	123	0	43	58	0	0	8	34	0	77	0	0	216	298	79	53	1169
8	2018-19	0	0	0	0	0	0	0	0	0	0	0	28	0	0	0	0	0	0	0	28
9	2018-19	0	0	52	0	0	0	0	0	0	0	0	77	0	0	0	0	0	0	0	129
10	2018-19	0	0	0	0	0	0	0	0	0	0	0	24	0	0	0	0	0	0	0	24
11	2018-19	0	0	0	0	0	0	0	0	0	0	0	29	0	0	0	0	0	0	0	29
12	2018-19	0	0	0	0	0	0	0	0	0	0	0	0	0	0	0	0	0	0	0	0
13	2018-19	69	0	152	0	0	43	0	0	0	0	79	82	37	0	0	0	0	156	43	661
14	2018-19	0	0	0	0	0	0	0	0	0	0	0	0	0	0	0	0	21	0	0	21
15	2018-19	0	0	0	0	0	0	0	0	0	0	0	0	0	0	0	0	48	0	0	48
16	2018-19	0	0	29	0	0	15	0	0	56	7	28	13	0	0	0	0	0	0	0	148
17	2018-19	198	0	2421	672	0	149	54	8	1854	15	421	312	63	0	7564	0	4	210	88	14033
18	2018-19	0	0	0	0	0	0	0	0	0	0	0	0	0	0	0	0	0	0	0	0
19	2018-19	0	0	19	0	0	0	0	0	0	0	0	0	0	33	0	0	0	0	6	58
20	2018-19	0	0	0	0	0	0	0	0	0	0	0	0	0	38	0	0	0	0	0	38
21	2018-19	0	19	0	0	0	0	0	0	0	0	0	0	0	0	0	0	0	0	0	19
22	2018-19	24	12	91	81	0	0	0	0	123	0	0	41	57	0	0	0	0	94	45	568
23	2018-19	53	33	78	0	0	19	18	0	0	0	30	0	13	0	0	0	0	51	18	313
24	2018-19	0	0	176	0	0	41	0	0	0	0	0	0	0	0	0	0	0	0	0	217
25	2018-19	0	0	151	46	0	0	0	0	0	0	0	0	0	0	0	0	0	0	0	197
26	2018-19	0	0	101	31	0	0	0	0	0	9	47	0	39	0	0	0	0	0	13	240
27	2018-19	0	5	51	27	0	0	0	0	0	0	0	35	0	0	0	3	121	0	0	242
28	2018-19	0	0	63	0	0	0	0	0	0	0	36	0	44	0	0	0	0	0	0	143
29	2018-19	0	0	85	0	0	26	19	0	0	5	0	0	0	0	0	0	0	0	14	149
30	2018-19	0	0	95	36	0	0	0	0	0	0	0	0	0	0	0	0	0	0	0	131
31	2018-19	21	0	70	0	0	39	0	0	0	15	44	36	52	0	0	0	5	0	32	314
32	2018-19	0	0	71	65	0	0	0	0	0	0	32	0	0	0	0	0	0	0	31	199
33	2018-19	0	0	56	0	0	25	8	0	0	0	0	0	0	0	0	0	0	0	0	89
34	2018-19	0	0	76	0	0	36	0	0	0	0	0	0	76	0	0	0	0	0	0	188
35	2018-19	0	0	172	0	0	139	0	0	0	0	133	0	0	0	0	0	0	0	0	444
36	2018-19	0	0	223	0	0	83	0	0	0	0	0	0	0	0	0	0	0	0	0	306
37	2018-19	0	0	67	0	0	19	10	0	0	0	36	0	0	0	0	0	0	0	0	132
38	2018-19	0	0	56	0	0	34	0	0	0	0	0	0	0	0	0	0	0	0	0	90
39	2018-19	0	0	0	0	0	13	0	0	0	0	27	0	0	0	0	0	0	0	0	40
40	2018-19	0	0	176	0	0	0	0	0	0	0	0	0	0	0	0	0	0	0	0	176
41	2018-19	0	0	286	0	0	0	0	0	0	0	56	48	0	0	0	0	0	0	0	390
42	2018-19	0	0	78	0	0	0	0	0	0	0	0	0	0	0	0	0	0	0	0	78
43	2018-19	0	0	56	0	0	24	39	0	0	0	57	0	0	0	0	0	0	0	0	176
44	2018-19	0	0	184	0	0	39	0	0	0	0	65	34	0	0	0	0	0	0	0	322
45	2018-19	0	0	57	0	0	0	0	0	0	0	69	0	0	0	0	0	0	0	0	126
46	2018-19	0	0	142	77	0	0	35	0	0	0	54	0	0	0	0	0	0	0	0	308
47	2018-19	0	0	0	254	0	0	0	0	0	0	73	0	0	0	0	0	0	0	0	327
48	2018-19	0	0	71	0	0	37	0	0	0	0	99	47	0	0	0	0	0	0	0	254
49	2018-19	0	0	85	0	0	0	0	0	0	0	0	0	0	0	0	0	0	0	0	85
50	2018-19	0	0	0	0	187	0	0	0	0	0	0	0	0	0	0	0	0	0	0	187
51	2018-19	0	0	44	0	0	11	0	0	0	0	29	0	0	0	0	0	0	0	6	90
52	2018-19	0	0	0	0	0	0	0	0	0	0	0	0	0	0	0	0	0	0	0	0
53	2018-19	0	0	208	145	0	45	0	0	0	0	0	0	0	0	0	0	0	0	0	398
54	2018-19	0	0	0	0	0	32	0	0	0	0	61	19	0	0	0	0	0	0	0	112
55	2018-19	0	0	48	0	0	32	0	0	0	0	0	33	0	0	0	0	0	0	0	113
56	2018-19	0	0	0	0	0	0	0	0	0	0	21	0	0	0	0	0	0	0	0	21
57	2018-19	0	0	121	0	0	51	32	0	0	0	56	61	0	0	0	0	0	0	0	321
58	2018-19	0	0	0	0	0	36	0	0	0	0	0	0	0	0	0	0	0	0	0	36
59	2018-19	0	0	22	0	0	23	0	0	0	0	32	0	61	0	0	0	0	0	0	138
60	2018-19	0	0	0	0	0	0	0	0	0	0	0	0	0	0	0	0	0	0	0	0
61	2018-19	0	0	0	0	0	0	0	0	0	0	0	0	0	0	76	0	0	0	0	76
62	2018-19	0	0	0	0	0	0	0	0	0	0	0	0	0	0	0	0	0	0	0	0
63	2018-19	0	0	0	0	21	0	0	0	0	0	0	0	0	0	0	0	0	0	0	21
64	2018-19	84	24	321	496	0	78	0	0	0	0	142	106	47	0	0	0	0	196	26	1520
65	2018-19	19	0	59	0	0	0	0	19	0	0	99	0	76	0	0	205	0	0	0	477
66	2018-19	0	0	67	0	0	44	0	0	0	0	0	0	0	0	0	0	0	0	0	111
67	2018-19	0	0	111	0	0	45	0	0	0	0	0	0	0	0	0	0	0	0	0	156
68	2018-19	0	0	47	19	0	17	0	0	0	0	0	0	0	0	0	0	0	0	0	83
69	2018-19	0	0	459	376	0	65	47	0	0	0	259	0	0	0	0	0	0	0	41	1247
70	2018-19	0	0	39	0	0	61	0	0	0	0	67	0	0	0	0	0	0	0	0	167
71	2018-19	0	0	88	0	0	94	0	0	0	0	106	0	0	0	0	0	0	0	0	288
72	2018-19	0	0	0	0	0	0	0	0	0	0	0	0	0	0	0	0	0	0	0	0
73	2018-19	0	0	87	0	0	76	41	0	0	0	0	0	0	0	234	0	0	0	0	438
74	2018-19	0	0	0	0	0	0	0	0	0	0	0	0	0	0	0	0	0	0	0	0
75	2018-19	0	0	93	0	0	31	0	0	0	0	0	0	0	0	0	0	0	0	0	124
76	2018-19	0	0	142	0	0	67	0	0	0	0	0	34	0	0	0	0	0	0	0	243
77	2018-19	0	0	21	0	0	0	0	0	0	0	0	0	0	0	0	0	0	0	0	21
78	2018-19	0	0	276	0	0	43	0	0	0	0	0	73	0	0	0	0	0	0	0	392
79	2018-19	0	0	99	0	0	33	0	0	0	0	0	56	0	0	0	0	0	0	0	188
80	2018-19	0	0	1543	0	0	342	0	0	0	0	629	0	0	0	0	0	0	0	0	2514
81	2018-19	0	0	431	0	0	73	81	0	0	0	0	151	0	0	0	0	0	0	0	736
82	2018-19	0	0	104	0	0	0	0	0	0	0	0	0	0	0	0	0	0	0	0	104
83	2018-19	263	27	106	87	0	22	45	0	210	0	56	25	65	0	0	0	0	0	25	931
84	2018-19	0	0	24	0	0	0	0	0	67	0	0	0	9	0	0	21	6	0	12	139
85	2018-19	0	0	59	0	0	34	35	0	0	0	135	35	24	0	0	0	0	0	0	322
86	2018-19	152	0	483	83	15	141	63	0	0	8	260	79	84	0	858	0	0	858	54	3138
87	2018-19	543	0	3121	1342	0	231	94	48	1121	15	376	162	101	0	211	0	0	420	88	7873
88	2018-19	0	9	0	0	0	0	0	0	0	0	0	0	0	0	0	321	0	0	0	330
89	2018-19	0	0	0	0	0	0	0	0	0	0	0	0	0	0	0	0	0	0	0	0
90	2018-19	0	0	0	0	0	0	0	0	0	0	0	0	0	0	0	0	121	0	0	121
91	2018-19	0	0	65	0	0	22	21	17	0	0	0	0	0	0	0	0	0	0	0	125
92	2018-19	0	0	0	0	0	45	0	0	0	0	0	0	18	0	0	0	0	0	0	63
93	2018-19	0	0	0	0	0	28	0	0	0	0	0	0	34	0	0	0	0	0	0	62
94	2018-19	11	36	680	51	0	86	43	34	760	0	167	102	49	214	2325	1763	2567	241	32	9161
95	2018-19	0	0	0	0	0	0	0	0	0	0	0	0	0	0	0	0	0	0	0	0
96	2018-19	0	0	55	0	0	12	0	0	0	0	0	284	45	0	0	378	89	0	0	863
97	2018-19	97	0	86	0	0	0	0	0	0	0	0	0	0	0	0	0	138	489	15	825
98	2018-19	0	26	960	678	267	0	45	13	0	0	106	76	79	0	0	0	0	92	37	2379
99	2018-19	217	0	233	0	0	54	0	0	0	0	108	172	0	0	0	0	0	126	32	942
100	2018-19	93	68	973	562	82	157	83	0	0	27	427	193	102	0	0	0	73	145	57	3042
101	2018-19	0	0	0	0	0	0	0	0	0	0	43	38	0	0	0	24	46	0	0	151
